# Supplementary material for: ﻿New segregates from the Neotropical genus Stryphnodendron (Leguminosae, Caesalpinioideae, mimosoid clade)
Source: PhytoKeys. 2022 Aug 22;205:203–37. doi: 10.3897/phytokeys.205.82220 (PMC9849044; doi:10.3897/phytokeys.205.82220)
Supplement: Supplementary material 2 — Table S1 [file phytokeys-205-203_article-82220__-s002.xlsx]

## Sheet: Samples and vouchers
Table S1. List of taxa and voucher information used in the phylogenomic analyses
Taxon	Voucher	Source
Albizia julibrissin RNA	living sample, Zurich	Koenen et al. 2020
Entada abyssinica RNA	living sample, Zurich	Koenen et al. 2020
Microlobius foetidus RNA	living sample, Zurich	Koenen et al. 2020
Entada africana	van der Maesen 7144	Ringelberg et al. 2022
Entada arenaria	Bamps 8098	Ringelberg et al. 2022
Entada pervillei	Koenen 302	Ringelberg et al. 2022
Entada polystachya	Amaral Santos 3326	Ringelberg et al. 2022
Entada tuberosa	Koenen 417	Ringelberg et al. 2022
Elephantorrhiza burkei	van der Bank 15	Ringelberg et al. 2022
Elephantorrhiza elephantina	Komape, Mabe, and Siebert 198	Koenen et al. 2020
Entada rheedei	Koenen 496	Koenen et al. 2020
Piptadeniastrum africanum	Koenen 152	Koenen et al. 2020
Aubrevillea kerstingii	Nimba Botanic Team JR957	Koenen et al. 2020
Stryphnodendron adstringens	de Queiroz 15580	Ringelberg et al. 2022
Stryphnodendron duckeanum	Simon 1606	Ringelberg et al. 2022
Stryphnodendron paniculatum	Simon 1058	Ringelberg et al. 2022
Stryphnodendron pulcherrimum	de Queiroz 15482	Koenen et al. 2020
Pseudopiptadenia contorta	de Queiroz 15582	Koenen et al. 2020
Pseudopiptadenia psilostachya	Simon 1245	Ringelberg et al. 2022
Pseudopiptadenia schumanniana	de Lima 7903	Ringelberg et al. 2022
Parapiptadenia excelsa	Hughes 2451	Ringelberg et al. 2022
Parapiptadenia zehntneri	de Queiroz 15692	Koenen et al. 2020
Pityrocarpa moniliformis	Wood 26516	Koenen et al. 2020
Lachesiodendron viridiflorum	de Queiroz 15614	Koenen et al. 2020
Piptadenia buchtienii	Hughes 2427	Ringelberg et al. 2022
Adenopodia sclerata	Jongkind 10602	Koenen et al. 2020
Mimosa ceratonia	de Queiroz 15484	Ringelberg et al. 2022
Albizia retusa	Hyland 2732	Koenen et al. 2020
Albizia saponaria	Jobson 1041	Koenen et al. 2020
Albizia umbellata subsp. umbellata	Larsen 33736	Ringelberg et al. 2022
Albizia umbellata	Jobson 1037	Koenen et al. 2020
Albizia adianthifolia	Wieringa 6278	Koenen et al. 2020
Albizia grandibracteata	Koenen 159	Koenen et al. 2020
Albizia zygia	Wieringa 5915	Koenen et al. 2020
Albizia anthelmintica	Maurin 363	Koenen et al. 2020
Albizia brevifolia	Maurin 826	Koenen et al. 2020
Albizia versicolor	Maurin 560	Koenen et al. 2020
Albizia ferruginea	Jongkind 10762	Koenen et al. 2020
Albizia viridis	Du Puy M251	Koenen et al. 2020
Albizia atakataka	Koenen 229	Koenen et al. 2020
Albizia polyphylla	Koenen 256	Koenen et al. 2020
Albizia bernieri	Koenen 354	Koenen et al. 2020
Albizia mahalao	Koenen 216	Koenen et al. 2020
Albizia obbiadensis	Thulin 4163	Koenen et al. 2020
Albizia boivinii	Koenen 270	Koenen et al. 2020
Albizia aurisparsa	Koenen 230	Koenen et al. 2020
Albizia masikororum	Koenen 237	Koenen et al. 2020
Albizia sahafariensis	Koenen 405	Koenen et al. 2020
Enterolobium barinense	Blanco 157	Ringelberg et al. 2022
Enterolobium cyclocarpum	MacQueen & Styles 75	Ringelberg et al. 2022
Leucochloron bolivianum	Hughes 2608	Koenen et al. 2020
Abarema cochliacarpos	de Queiroz 15538	Koenen et al. 2020
Jupunba abbottii	Zanoni 21220	Ringelberg et al. 2022
Acacia ampliceps	Murphy 323	Ringelberg et al. 2022
Pithecellobium excelsum	Hughes 3101	Ringelberg et al. 2022
Cojoba filipes	Colella 1331	Ringelberg et al. 2022
Zapoteca nervosa	Garcia 665	Ringelberg et al. 2022
Calliandra bella	de Queiroz 15696	Ringelberg et al. 2022
Senegalia nigrescens	Barnes 536	Ringelberg et al. 2022
Parkia bahiae	de Queiroz 15699	Ringelberg et al. 2022
Dichrostachys myriophylla	Koenen 301	Ringelberg et al. 2022
Prosopis africana	Essou 2110	Koenen et al. 2020
Xylia torreana	Maurin et al. RBN171	Ringelberg et al. 2022
Dimorphandra davisii	Luckow 4593	Ringelberg et al. 2022
Caesalpinia cassioides	Pennington 789	Ringelberg et al. 2022
Ceratonia siliqua	Wieringa 3477	Ringelberg et al. 2022
